# Supplementary material for: Clinical characteristics of patients with 2019 coronavirus disease in a non-Wuhan area of Hubei Province, China: a retrospective study
Source: Springer Nature journal article supplement (doi:10.1186/s12879-020-05010-w), 2020-04-29
Supplement: MOESM1 [file 17937168]

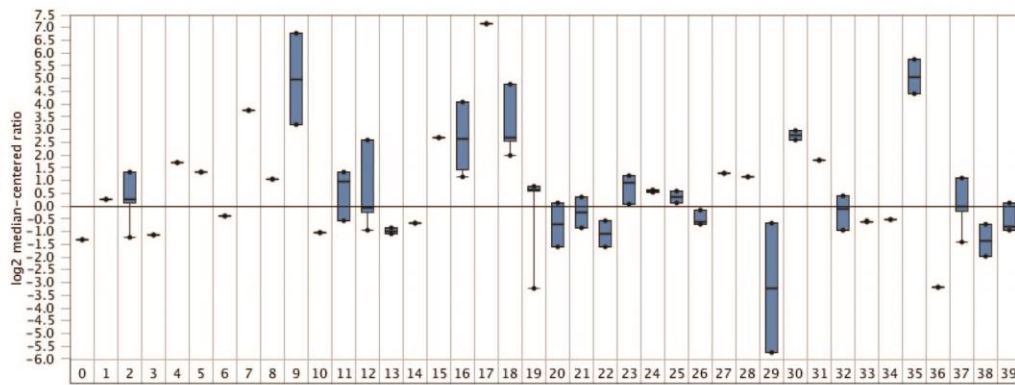

- |                               |                                |
|-------------------------------|--------------------------------|
| 0. No value (5)               | 20. Lung (2)                   |
| 1. Abdominal Muscle (1)       | 21. Lymph Node (2)             |
| 2. Adrenal Gland (4)          | 22. Occipital Lobe (2)         |
| 3. Ascending Colon (1)        | 23. Ovary (3)                  |
| 4. Breast (1)                 | 24. Pancreas (2)               |
| 5. Buffyccoat (1)             | 25. Parathyroid Gland (2)      |
| 6. Cervix Uteri (1)           | 26. Parotid Gland (3)          |
| 7. Colon (1)                  | 27. Pericardium (1)            |
| 8. Diaphragm (1)              | 28. Placenta (1)               |
| 9. Duodenum (2)               | 29. Prostate Gland (2)         |
| 10. Epididymis (1)            | 30. Seminal Vesicle (2)        |
| 11. Esophagus (3)             | 31. Sigmoid Colon (1)          |
| 12. Fallopian Tube (4)        | 32. Spleen (3)                 |
| 13. Frontal Lobe (3)          | 33. Stomach (2)                |
| 14. Fundus of the Stomach (1) | 34. Temporal Lobe (1)          |
| 15. Gallbladder (1)           | 35. Testis (2)                 |
| 16. Heart (6)                 | 36. Thymus Gland (1)           |
| 17. Ileum (1)                 | 37. Thyroid Gland (6)          |
| 18. Kidney (5)                | 38. Tonsil (2)                 |
| 19. Liver (4)                 | 39. Wall of Body of Uterus (3) |

Supplementary Fig 1. ACE2 distribution in different normal tissues from Oncomine (Nucleotide Acc No.:AA416585).
